# Supplementary material
Source: PubMed Central journal article supplement (PMC3567271)
Supplement: mmc1.pdf [file mmc1.pdf]

American Journal of Human Genetics, Volume 92

## **Supplemental Data**

### **Loss of Function of Glucocerebrosidase GBA2**

#### **Is Responsible for Motor Neuron Defects**

#### **in Hereditary Spastic Paraplegia**

**Elodie Martin, Rebecca Schule, Katrien Smets, Agnès Rastetter, Amir Boukhris, José L. Loureiro, Michael A. Gonzalez, Emeline Mundwiller, Tine Deconinck, Marc Wessner, Ludmila Jornea, Andrés Caballero Oteyza, Alexandra Durr, Jean-Jacques Martin, Ludger Schols, Chokri Mhiri, Foudil Lamari, Stephan Züchner, Peter De Jonghe, Edor Kabashi, Alexis Brice, and Giovanni Stevanin**

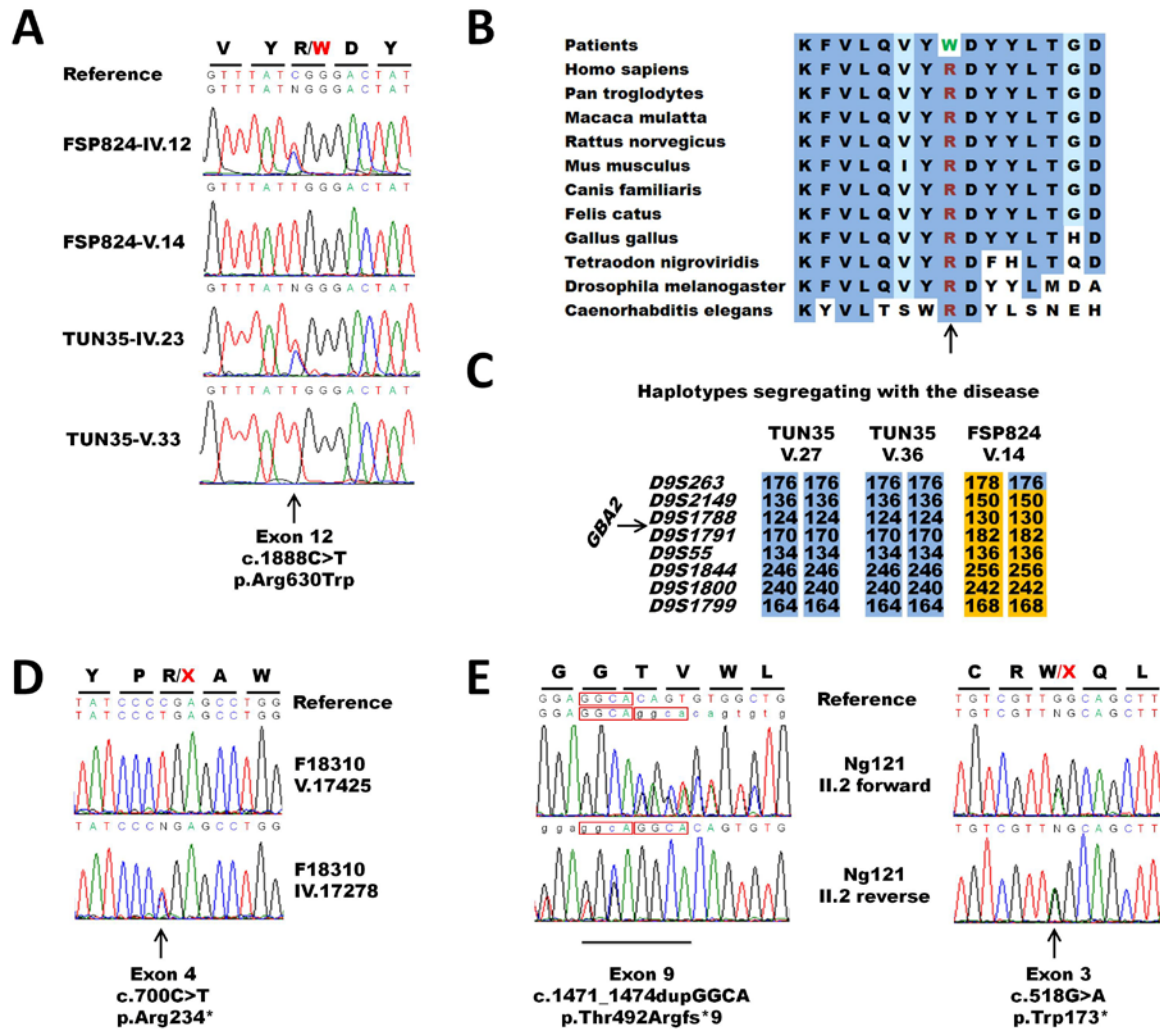

Figure S1. Mutations in *GBA2* (RefSeq NM\_020944.2)

(A, D, E) Sequencing chromatograms showing the identified mutations in subjects of the TUN35 and FSP824 families (A) and in individuals of families F18310 (D) and Ng121 (E). All mutations were checked using ALAMUT 2.2 and Mutalyzer: c.518G>A (p.Trp173\*), c.700C>T (p.Arg234\*), c.1888C>T (p.Arg630Trp) and c.1471\_1474dupGGCA (p.Thr492Argfs\*9).

(B) Conservation of amino acid Arg (R) 630 across various species.

(C) Haplotypes of eight chromosome 9 microsatellites covering the *SPG46* candidate region in three subjects with the p.Arg630Trp homozygous mutation. Alleles are given in base pairs.

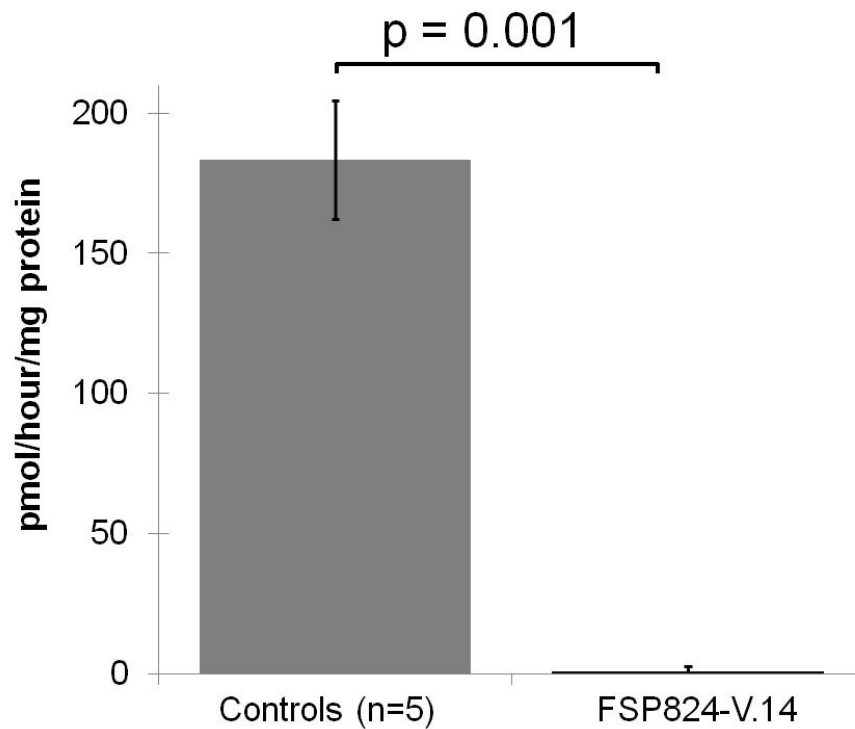

**Figure S2. Glucosylceramidase Activity in Lymphoblasts**

Lymphoblastoid cell lines of one SPG46 individual (FSP824-V.14, sampling at 30 years of age) and of five healthy controls (sampling at 31, 35, 52, 69 and 73 years) were obtained following transformation with the Epstein-Barr virus of mononuclear white blood cells. Lymphoblasts were maintained in RPMI 1640/L-Glutamine culture medium (PAA) supplemented with 15% fetal bovine serum, penicillin (100 UI/ml) and streptomycin (100 µg/ml) and 1% HEPES (4-[2-hydroxyethyl]-1-piperazineethanesulfonic acid) buffer. Cells were harvested, pelleted and washed twice with PBS pre-cooled at 4°C before re-suspension in water with a protease inhibitor cocktail (Complete, EDTA-free, Roche). The activity of the non-lysosomal glucosylceramidase was tested using 20 µg of total protein that were preincubated with 5 mM of conduritol-β-epoxide (CBE) (Sigma) to inhibit the lysosomal glucocerebrosidase GBA1 for 1 hour at 4°C, rotating at 1000 rpm. Assays were incubated with 5 mM of the artificial 4-methylumbelliferyl-β-glucoside substrate (4-MU-β-glucoside, Sigma) in McIlvaine buffer (0.1 M citrate and 0.2 M phosphate buffer, pH 5.8) for 1 hour at 37°C rotating at 500 rpm and enzymatic reactions were stopped by the addition of 200 µl of glycine-carbonate buffer (pH 10.7). The amount of liberated 4-MU was determined with a FlexStation 3 Benchtop Multi-Mode Microplate Reader (Molecular Devices). The data were expressed as pmoles of converted substrate/ mg cell proteins/ hour. All measures were done in triplicate. Statistical comparison was done between the mean of the triplicates of the affected subject compared to the means obtained in controls. Error bars are SEM.

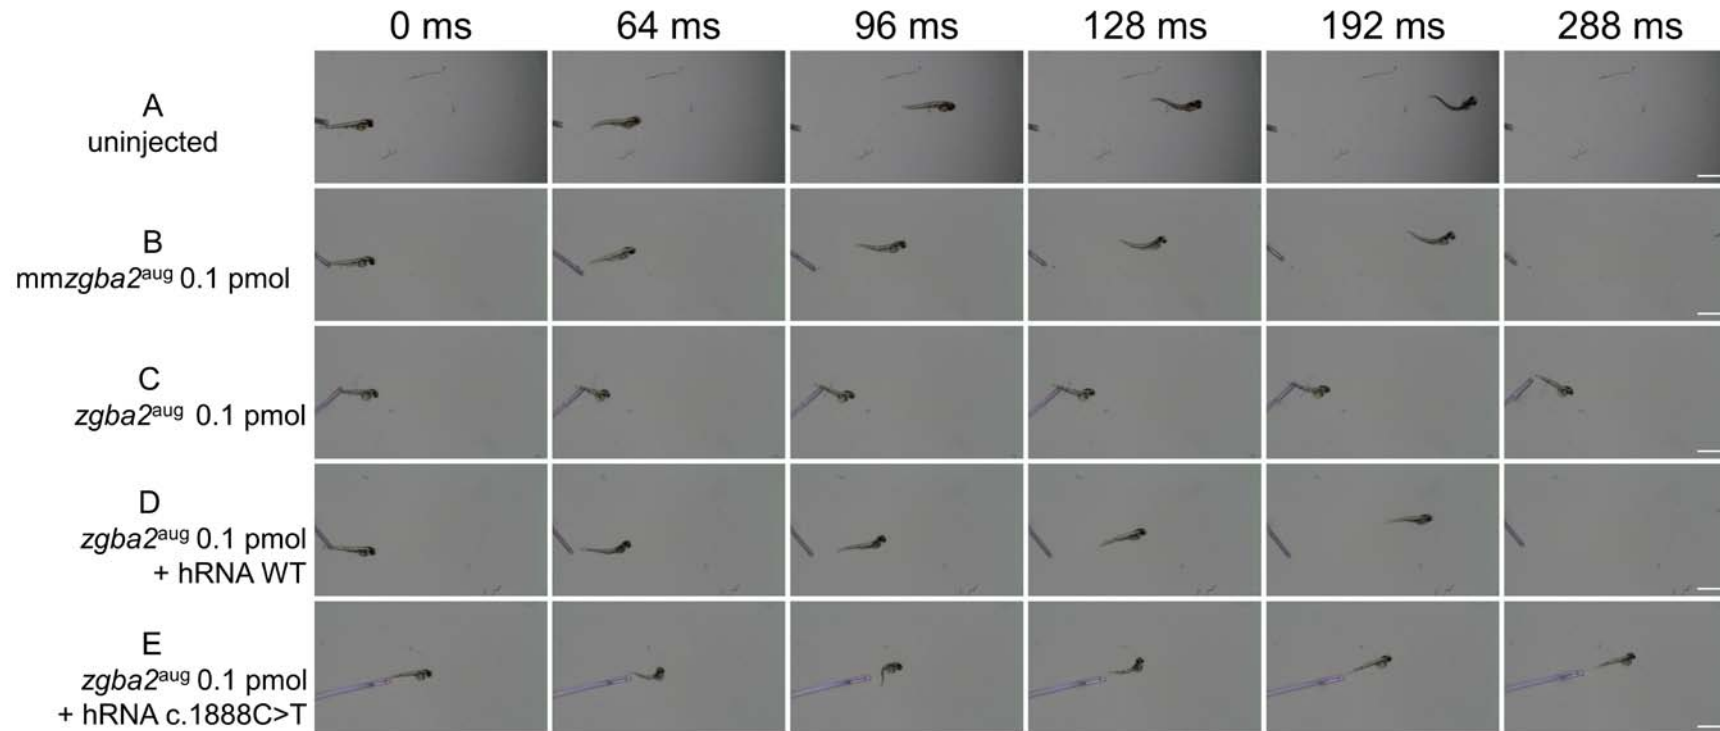

**Figure S3. *zGba2* Inactivation Leads to Locomotor Defects that are Rescued by the WT *hGBA2* mRNA, but not by the Mutated c.1888 C>T mRNA**

This figure shows the series of images taken at various times after the zebrafish tail was lightly touched. Uninjected (A) or mmz*Gba2*<sup>aug</sup> morphants (B) instantly reacted by swimming rapidly away. In contrast, larvae depleted for *zGba2* (C) showed a very weak response when touched on the tail. When AMO *zGba2*<sup>aug</sup> was co-injected with h*GBA2* WT mRNA (D), morphants recovered a perfect swimming reflex, in contrast to double AMO *zGba2*<sup>aug</sup> – h*GBA2* c.1888C>T mRNA injected morphants (E), which showed severe locomotor defects. Scale bar, 2 mm.

**Table S1. *SPG46* Exon Capture and Next-Generation Sequencing in Subjects of Family TUN35**

|                                                    | Individuals   |               |
|----------------------------------------------------|---------------|---------------|
|                                                    | TUN35-V.33    | TUN35-V.32    |
| <b>Total number of reads</b>                       | 195,811       | 558,763       |
| <b>Average length (bp)</b>                         | 311           | 389           |
| <b>Mapped reads</b>                                | 177,574 (91%) | 555,255 (99%) |
| <b>Unique reads overlapping enriched regions</b>   | 106,419 (60%) | 340,753 (61%) |
| <b>Number of enriched regions</b>                  | 1,727         | 1,727         |
| <b>Regions with matching unique reads</b>          | 1,705 (99%)   | 1,725 (100%)  |
| <b>Regions covered entirely</b>                    | 1,203 (70%)   | 1,658 (96%)   |
| <b>Regions with an effective coverage over 10X</b> | 1,026 (59%)   | 1,690 (98%)   |
| <b>Effective coverage on enriched region</b>       | 14X           | 76X           |

Sequencing of all exons of the *SPG46* linkage interval was performed with the use of a custom sequence capture array (Roche NimbleGen, Madison, WI) focusing on exons ( $n=1,727$  from 183 genes) and 1 kb of untranslated regions (UTR) on chromosome 9 between positions 27,536,543 bp and 75,455,094 bp that was used to hybridize shotgun fragment libraries obtained from DNA of both selected subjects. Massively parallel sequencing was performed on this enriched library using the Roche 454 GS FLX sequencer (Roche) with Titanium reagents. Sequence data were then aligned with the hg18 version of the human genome as a reference (Ensembl database) at the Genoscope facility and analyzed using in-house software.

A mean of 377,287 sequencing reads was obtained with an average length of 350 bp, of which 95% of all reads could be mapped, 60% of them overlapping the enriched regions. From the total of 1,727 enriched regions, 83% were covered entirely, and 78% of targeted bases were covered at least 10-fold. The mean coverage of enriched regions was 45-fold. Variant filtering excluded those that had fewer than three reads or accounted for 25% or less of all reads.

**Table S2. Primers Used for *GBA2* Sanger Sequencing**

| <b>Name</b>   | <b>Oligonucleotide sequence</b> |
|---------------|---------------------------------|
| GBA2-EX1F     | CCGTCCAGGACCTACAGAGA            |
| GBA2-EX1R     | GACAAGAAGCCCAACTGCTT            |
| GBA2-EX1altF  | CTGTGCGTAAAAAGGGGAAC            |
| GBA2-EX1altR  | CGCCTACCCCTCCTATATCC            |
| GBA2-EX2-3F   | GAGGAAGAAAGGTTTGAAAGCA          |
| GBA2-EX2-3R   | CAGGAAGCATCCCAGAGTA             |
| GBA2-EX4F     | GTAGTGGAGAAGGGAGAGAAAGC         |
| GBA2-EX4R     | AGATATGGGGTTTTACGTGTTAG         |
| GBA2-EX5F     | AGGTTGGAGCCATGAACATC            |
| GBA2-EX5R     | AGCTCCCCAGCTCCTCTTAC            |
| GBA2-EX6F     | CACGAGTCACGGTAAGGAAAAG          |
| GBA2-EX6R     | GCTTTGGCCTGAGAGAAAACA           |
| GBA2-EX7F     | GATGGTGGGAAGAGAGGTTG            |
| GBA2-EX7R     | CTCTGCCAAGCTGAGATCCT            |
| GBA2-EX8F     | GTAGGCATTGCTGGAGCTGT            |
| GBA2-EX8R     | CCTCCAAGATGGAAAGGAT             |
| GBA2-EX9F     | CCGGTATTGGATGACAGGTG            |
| GBA2-EX9R     | CCCCTCTGTAGCTTGTCTC             |
| GBA2-EX10F    | GGTTAGGATGAGGGGGTGT             |
| GBA2-EX10R    | CTGGGGGAGAGACACAGAAG            |
| GBA2-EX11F    | TATGCTTCCTTTGCCCTCAT            |
| GBA2-EX11R    | GGTTCAGGTCTTCCAATCA             |
| GBA2-EX11seqF | GCTCTGGCCACTCTCAGGGA            |
| GBA2-EX12-13F | GCACCTGTGAAAAGGAGGAA            |
| GBA2-EX12-13R | CTGATCAGGGACATGGGTTT            |
| GBA2-EX14-15F | GAGGCTATGCAGACCAGACC            |
| GBA2-EX14-15R | TGGACGTTTCAGCTCAAAGATAG         |
| GBA2-EX16F    | GACTCCAGGCCGCTATTACA            |
| GBA2-EX16R    | CCCAGCAAGTGGAGGAGATA            |
| GBA2-EX17F    | GGCTTCTGTCTGTGGGTCAT            |
| GBA2-EX17R    | GTCAGGGAACAGGTGAGGAA            |

All coding exons of *GBA2*, including flanking splicing sites and at least 50 bp of intronic sequence on each side, were PCR-amplified using specific primers in a final volume of 10  $\mu$ l with 0.4 unit of Dream Taq (Fermentas), 20 ng of genomic DNA in 1/5 Solution Q (Qiagen), at an annealing temperature going down regularly from 65 to 55°C between two PCR cycles. Sequencing reactions were performed using BigDye chemistry according to the manufacturer's protocol (Applied Biosystems). The sequence products were run on an ABI-3730 sequencer, and electrophoretic profiles were compared with the hg19 reference sequence (NM\_020944.2) using Seqscape 2.6 (Applied Biosystems) and BioEdit Sequence Alignment Editor (Ibis Biosciences, Carlsbad, CA). The effects of variants and mutations were analyzed using ALAMUT 2.2 (Interactive Biosoftware, Rouen, France).

**Table S3. Clinical Description of SPG46 Affected Individuals**

| Family                           | Ng121                                                                    |             |            | F18310                           |                           | FSP824 (SR59)                                                                   | TUN35                               |            |            |            |            |
|----------------------------------|--------------------------------------------------------------------------|-------------|------------|----------------------------------|---------------------------|---------------------------------------------------------------------------------|-------------------------------------|------------|------------|------------|------------|
| Mutation(s)                      | c.518G>A, p.Trp173* + c.1471_1474dupGGCA, p.Thr492Argfs*9 (heterozygous) |             |            | c.700C>T, p.Arg234* (homozygous) |                           | c.1888C>T, p.Arg630Trp (homozygous)                                             | c.1888C>T, p.Arg630Trp (homozygous) |            |            |            |            |
| Consanguinity / Origin           | No / Belgium                                                             |             |            | Yes / Turkey                     |                           | Yes / Portugal                                                                  | Yes / Tunisia                       |            |            |            |            |
| Individual No. (sex)             | II.1 (F)                                                                 | II.2 (F)    | II.3 (M)   | V.16484 (F)                      | V.17425 (F)               | V.14 (F)                                                                        | V.27 (M)                            | V.26 (F)   | V.32 (F)   | V.33 (F)   | V.36 (F)   |
| Age at last examination (years)  | 63                                                                       | 61          | 58         | 40                               | 22                        | 30                                                                              | 30                                  | 32         | 35         | 31         | 32         |
| Age at death (years)             | 63                                                                       | 61          | 72         | NA                               | NA                        | NA                                                                              | NA                                  | NA         | NA         | NA         | NA         |
| Age at onset (years)             | 7                                                                        | 7           | 7          | 1                                | Infancy                   | 16                                                                              | 2                                   | 2          | 2          | 6          | 10         |
| Disease duration (years)         | 56                                                                       | 54          | 65         | 39                               | -20                       | 14                                                                              | 28                                  | 30         | 33         | 25         | 22         |
| Disability scale <sup>a</sup>    | 7                                                                        | 7           | 6          | 2                                | 4                         | 3                                                                               | 2                                   | 3          | 4          | 3          | 3          |
| LL spasticity                    | Severe                                                                   | Severe      | Severe     | Severe                           | Moderate                  | Severe                                                                          | Severe                              | Moderate   | Severe     | Severe     | Mild       |
| LL reflexes                      | Very brisk                                                               | Very brisk  | Very brisk | Very brisk                       | Very brisk                | Very brisk                                                                      | Very brisk                          | Very brisk | Very brisk | Very brisk | Very brisk |
| LL distal weakness               | Moderate                                                                 | Moderate    | Moderate   | Mild                             | Moderate                  | Moderate                                                                        | Moderate                            | Moderate   | Moderate   | Mild       | Moderate   |
| LL distal amyotrophy             | +                                                                        | +           | +          | -                                | -                         | -                                                                               | -                                   | -          | -          | -          | -          |
| Extensor plantar reflexes        | +                                                                        | +           | +          | +                                | +                         | +                                                                               | +                                   | +          | +          | +          | +          |
| UL spasticity                    | Severe                                                                   | Severe      | Moderate   | Mild                             | Mild                      | Moderate                                                                        | Mild                                | Mild       | Mild       | Moderate   | Mild       |
| UL reflexes                      | Very brisk                                                               | Very brisk  | Very brisk | Very brisk                       | Very brisk                | Very brisk                                                                      | Brisk                               | Very brisk | Brisk      | Brisk      | Brisk      |
| UL distal weakness               | Moderate                                                                 | Moderate    | Moderate   | -                                | Reduced fine motor skills | Mild                                                                            | Mild                                | -          | -          | -          | -          |
| UL distal amyotrophy             | +                                                                        | +           | +          | -                                | -                         | -                                                                               | -                                   | -          | -          | -          | -          |
| Cognitive decline                | Severe                                                                   | Very severe | Moderate   | Mild / Moderate                  | Moderate                  | Very mild, frontal type (MMSE 22, total IQ 65, verbal IQ 72, performance IQ 72) | Mild                                | Mild       | Mild       | Mild       | Mild       |
| Cerebellar ataxia and dysarthria | +                                                                        | +           | +          | +                                | +                         | +                                                                               | +                                   | +          | +          | +          | +          |
| Decreased vibration sense        | +                                                                        | +           | +          | +                                | +                         | -                                                                               | +                                   | -          | -          | -          | -          |
| Pseudo bulbar dysarthria         | +                                                                        | +           | +          | -                                | +                         | +                                                                               | +                                   | +          | -          | +          | -          |

|                                           |                                            |                                                                                                                                 |                                                                                                                     |                                              |                                                  |                                                                |                                                 |    |                                      |            |    |
|-------------------------------------------|--------------------------------------------|---------------------------------------------------------------------------------------------------------------------------------|---------------------------------------------------------------------------------------------------------------------|----------------------------------------------|--------------------------------------------------|----------------------------------------------------------------|-------------------------------------------------|----|--------------------------------------|------------|----|
| Pes cavus                                 | -                                          | -                                                                                                                               | -                                                                                                                   | -                                            | -                                                | -                                                              | +                                               | +  | +                                    | +          | -  |
| Scoliosis                                 | +                                          | +                                                                                                                               | +                                                                                                                   | -                                            | -                                                | -                                                              | +                                               | -  | -                                    | +          | -  |
| Urinary symptoms                          | -                                          | +                                                                                                                               | +                                                                                                                   | +                                            | +                                                | Mild                                                           | +                                               | +  | -                                    | -          | -  |
| Genital symptoms and hormonal exploration | -                                          | Small amount of pubic hair                                                                                                      | Hypogonadism, hypogonitalism                                                                                        | -                                            | NE                                               | -                                                              | Hypogonadism, infertility (see Table S4)        | NE | NE                                   | NE         | NE |
| Cataract                                  | +                                          | +                                                                                                                               | +                                                                                                                   | +                                            | +                                                | +                                                              | +                                               | +  | +                                    | +          | +  |
| Other signs                               | Kyphosis, hearing loss, anemia             | Kyphosis, hearing loss, anemia                                                                                                  | Hyperkyphosis, hearing loss, anemia                                                                                 | Diabetes mellitus, anemia                    | Diabetes mellitus, obesity, cleft lip and palate | Mild facial and pronounced cervical dystonia with rectrocollis | Facial dyskinesia, bilateral action hand tremor | -  | Depression                           | Strabismus | -  |
| Sural nerve biopsy                        | Collateral sprouting, onion bulbs          | Bands of Büngner, collateral sprouting, onion bulbs                                                                             | Bands of Büngner, collateral sprouting, onion bulbs                                                                 | ND                                           | ND                                               | ND                                                             | ND                                              | ND | ND                                   | ND         | ND |
| ENMG                                      | Axonal polyneuropathy                      | Axonal polyneuropathy                                                                                                           | Axonal sensorimotor neuropathy                                                                                      | Axonal demyelinating sensorimotor neuropathy | Axonal-demyelinating sensorimotor neuropathy     | Normal                                                         | Normal                                          | ND | ND                                   | ND         | ND |
| Brain MRI                                 | ND (brain CT: discrete cerebellar atrophy) | TCC, cerebellar and cerebral atrophy, mammillary body and mesencephalon atrophy (hummingbird/colibri sign), periventricular WMH | TCC, cerebellar and cerebral atrophy, mammillary body atrophy and mesencephalon atrophy (hummingbird/ colibri sign) | TCC, cerebellar atrophy                      | ND                                               | Very mild TCC, slight cerebral atrophy                         | TCC, cerebellar and cerebral atrophy            | ND | TCC, cerebellar and cerebral atrophy | ND         | ND |

ENMG: electroneuromyography; F: female; IQ: intelligence quotient; LL: lower limbs; M: male; MMSE: Mini-Mental State Examination; MRI: magnetic resonance imaging; NA: not applicable; NE: not examined; ND: not done; TCC: thin corpus callosum; UL: upper limbs; WMH: white matter hyperintensities; +: present; - absent.

<sup>a</sup> Disability was assessed on a 7-point scale in which 1 indicates minimal disability (slight stiffness of the legs); 2, mild disability (unable to run, but full autonomy); 3, moderate disability in walking (reduced perimeter, frequent falls); 4, severe disability (unilateral assistance required to walk); 5, bilateral assistance required to walk; 6, wheelchair bound; and 7, bedridden.



**Table S4. Sperm Count, Motility and Morphology in Subject TUN35-V.27**

|                                                | <b>TUN35-V.27</b> | <b>Control conditions</b> |
|------------------------------------------------|-------------------|---------------------------|
| <b>Sperm volume (ml)</b>                       | 4.3 ± 1.7         | 2 - 6                     |
| <b>Spermatozoid concentration (million/ml)</b> | 3.875 ± 1.575     | > 20                      |
| <b>Spermatozoid normal mobility (%)</b>        | 3.5 ± 0.5         | > 40                      |
| <b>Normal morphology (%)</b>                   | 11.5 ± 1.5        | > 30                      |

The results are mean ± SEM derived from two independent spermograms.

Sperm was analyzed from two different semen samples of subject TUN35-V.27 collected within five months of each other. Semen samples were obtained by masturbation after 3-5 days of abstinence. Sperm concentration, viability, motility and morphology in semen were determined using standard methods.

Heads of spermatozoids were small, elongated and thin. Acrosomes were abnormal as well as the midpiece. Spermatozoids also presented a severe reduction in velocity. Morphological and behavioral spermatozoid abnormalities were accompanied by severe necrostermia.

**Table S5. Comparison of Axonal Architecture between *zGba2* Morphants at 48 hpf****A. Axonal Morphology**

| <b>Morphants</b>                           | <b>Normal axonal morphology (%)</b> | <b>Abnormal axonal morphology (%)</b> | <b>Number of counted axons</b> |
|--------------------------------------------|-------------------------------------|---------------------------------------|--------------------------------|
| mm <i>zGba2</i> <sup>aug</sup>             | 56                                  | 2                                     | 58                             |
| <i>zGba2</i> <sup>aug</sup>                | 38                                  | 20                                    | 58                             |
| <i>zGba2</i> <sup>aug</sup> + hRNA WT      | 47                                  | 1                                     | 48                             |
| <i>zGba2</i> <sup>aug</sup> + hRNA mutated | 28                                  | 16                                    | 44                             |

**B. Statistical Evaluation**

| <b>Statistical comparison</b>                                                       | <b>p value</b> | <b>Conclusion</b>                                                                                                            |
|-------------------------------------------------------------------------------------|----------------|------------------------------------------------------------------------------------------------------------------------------|
| mm <i>zGba2</i> <sup>aug</sup> vs <i>zGba2</i> <sup>aug</sup>                       | < 0.00001      | Invalidating <i>zGba2</i> has effects on axonal branching                                                                    |
| mm <i>zGba2</i> <sup>aug</sup> vs <i>zGba2</i> <sup>aug</sup> + hRNA WT             | 0.87           | No phenotypic differences between zebrafishes injected with the mismatch AMO or <i>zGba2</i> morphant with the WT human mRNA |
| mm <i>zGba2</i> <sup>aug</sup> vs <i>zGba2</i> <sup>aug</sup> + hRNA mutated        | < 0.00001      | Mutant mRNA does not rescue the phenotype, due to the <i>zGba2</i> <sup>aug</sup> AMO                                        |
| <i>zGba2</i> <sup>aug</sup> vs <i>zGba2</i> <sup>aug</sup> + hRNA WT                | < 0.00001      | WT mRNA rescues the knock-down phenotype                                                                                     |
| <i>zGba2</i> <sup>aug</sup> + hRNA WT vs <i>zGba2</i> <sup>aug</sup> + hRNA mutated | < 0.00001      | WT and mutant hRNA do not have similar effects on motoneuron morphology                                                      |

Axonal morphology was observed with the Znp-1 staining and manually evaluated by distinguishing between normal-looking axons and abnormal-looking (i.e. shorter or over-branched) axons. Statistical analyses were performed by comparing the proportion of normal and abnormal axons between the control-injected population and injected embryos using the Chi square test. Counts were done in at least 10 different zebrafishes in all conditions.

AMO: antisense morpholino oligonucleotide; hpf: hours postfertilization; h: human; vs: versus; WT: wild type.
